# Supplementary material
Source: PubMed Central journal article supplement (PMC5515284)
Supplement: NIHMS878621-supplement-Supporting_Information.pdf [file NIHMS878621-supplement-Supporting_Information.pdf]

## Supporting Information for

### CanProVar 2.0: an Updated Database of Human Cancer Proteome Variation

Menghuan Zhang<sup>1,4</sup>, Bo Wang<sup>1</sup>, Jia Xu<sup>1</sup>, Xiaojing Wang<sup>2,3</sup>, Lu Xie<sup>4</sup>, Bing Zhang<sup>2,3\*</sup>, Yixue Li<sup>1,4,5\*</sup>,  
Jing Li<sup>1,4\*</sup>

<sup>1</sup> Department of Bioinformatics & Biostatistics, School of Life Science and Biotechnology, Shanghai Jiao Tong University, Shanghai 200240, China

<sup>2</sup> Department of Molecular and Human Genetics, Baylor College of Medicine, One Baylor Plaza, Suite NB100, Houston, TX 77030

<sup>3</sup> Lester & Sue Smith Breast Center, Baylor College of Medicine, One Baylor Plaza, Suite NB100, Houston, TX 77030

<sup>4</sup> Shanghai Center for Bioinformation Technology, Shanghai Academy of Science and Technology, Shanghai, 201203, China

<sup>5</sup> Key Lab of Systems Biology, Shanghai Institutes for Biological Sciences, Chinese Academy of Sciences, Shanghai 200031, China

## Supplementary Figures

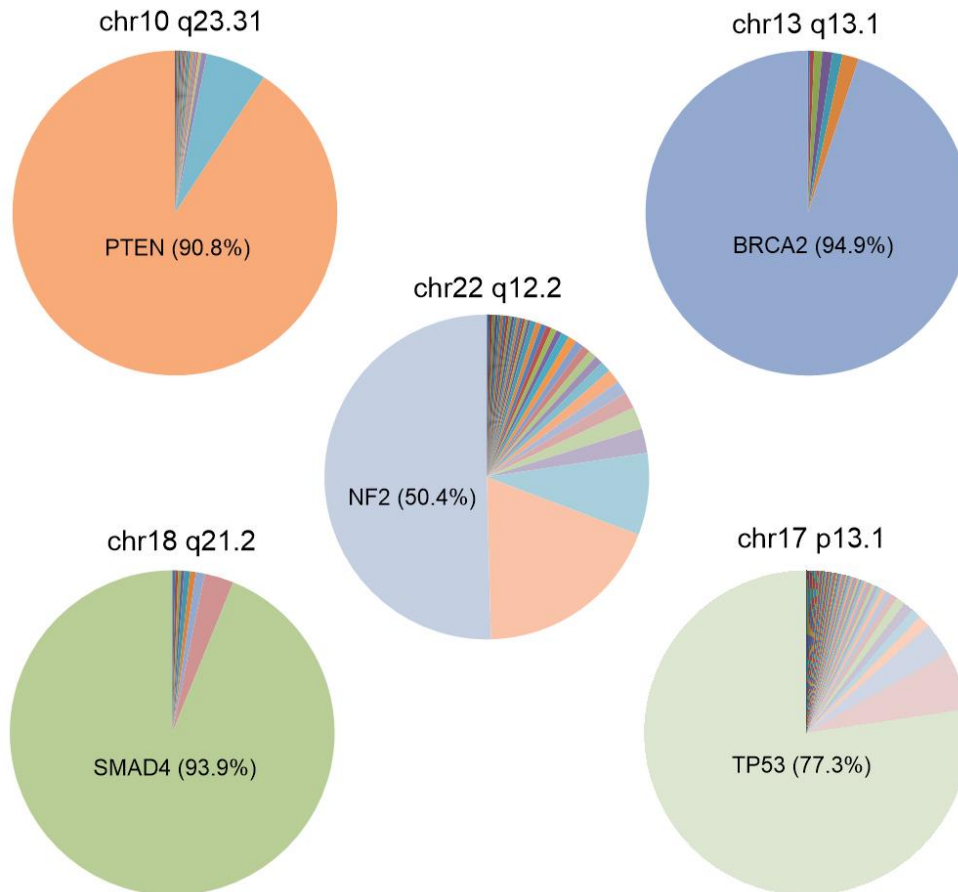

**Figure S1. Hot chromosome locations containing one or more significant peaks of variations.** The distribution of mutations across human chromosomal bands was investigated. A few hot chromosome locations containing one or more significant peaks of variations were found. But more than half of the variations contained in each peak can be explained by very few well-known cancer genes.

## Supplementary Tables

**Table S1. 167 mutated proteins with high ‘crVARs : ncrVARs’ ratios in cancers**

| gene name      | protein ID      | crVARs count | ncrVARs count | ratio (crVARs : ncrVARs) |
|----------------|-----------------|--------------|---------------|--------------------------|
| <b>PTEN</b>    | ENSP00000361021 | 375          | 1             | 375                      |
| <b>SMARCB1</b> | ENSP00000263121 | 50           | 1             | 50                       |
| <b>TP53</b>    | ENSP00000269305 | 459          | 11            | 41.73                    |
| <b>CEBPA</b>   | ENSP00000427514 | 74           | 2             | 37                       |
| <b>RUNX1</b>   | ENSP00000300305 | 70           | 2             | 35                       |
| <b>SMAD4</b>   | ENSP00000381452 | 114          | 4             | 28.5                     |
| <b>SMAD4</b>   | ENSP00000341551 | 113          | 4             | 28.25                    |
| <b>PIK3CA</b>  | ENSP00000263967 | 162          | 6             | 27                       |
| <b>TP53</b>    | ENSP00000391478 | 384          | 15            | 25.6                     |
| <b>DNMT3A</b>  | ENSP00000264709 | 70           | 3             | 23.33                    |
| <b>DNMT3A</b>  | ENSP00000324375 | 70           | 3             | 23.33                    |
| <b>NF2</b>     | ENSP00000344666 | 186          | 11            | 16.91                    |
| <b>MAP2K4</b>  | ENSP00000262445 | 14           | 1             | 14                       |
| <b>EZH2</b>    | ENSP00000320147 | 53           | 4             | 13.25                    |
| <b>VHL</b>     | ENSP00000256474 | 253          | 21            | 12.05                    |
| <b>PAK3</b>    | ENSP00000361077 | 11           | 1             | 11                       |
| <b>OGT</b>     | ENSP00000362824 | 11           | 1             | 11                       |
| <b>OGT</b>     | ENSP00000362805 | 11           | 1             | 11                       |
| <b>STK11</b>   | ENSP00000324856 | 53           | 5             | 10.6                     |
| <b>KCNA6</b>   | ENSP00000280684 | 10           | 1             | 10                       |
| <b>CDC73</b>   | ENSP00000356405 | 26           | 3             | 8.67                     |
| <b>MEN1</b>    | ENSP00000308975 | 103          | 12            | 8.58                     |
| <b>TET2</b>    | ENSP00000369351 | 273          | 33            | 8.27                     |
| <b>GRM3</b>    | ENSP00000355316 | 33           | 4             | 8.25                     |
| <b>PRMT8</b>   | ENSP00000372067 | 8            | 1             | 8                        |
| <b>FBXW7</b>   | ENSP00000281708 | 79           | 11            | 7.18                     |
| <b>PRKAR1A</b> | ENSP00000351410 | 7            | 1             | 7                        |
| <b>CPSF2</b>   | ENSP00000298875 | 7            | 1             | 7                        |
| <b>PRKAR1A</b> | ENSP00000376474 | 7            | 1             | 7                        |
| <b>PRKAR1A</b> | ENSP00000376475 | 7            | 1             | 7                        |
| <b>PRKAR1A</b> | ENSP00000445625 | 7            | 1             | 7                        |
| <b>NF1</b>     | ENSP00000351015 | 149          | 22            | 6.77                     |
| <b>TP53</b>    | ENSP00000410739 | 65           | 10            | 6.5                      |
| <b>MEF2C</b>   | ENSP00000426665 | 13           | 2             | 6.5                      |
| <b>MEF2C</b>   | ENSP00000396219 | 13           | 2             | 6.5                      |

|                  |                 |     |    |      |
|------------------|-----------------|-----|----|------|
| <b>SMARCA4</b>   | ENSP00000343896 | 44  | 7  | 6.29 |
| <b>PTCH1</b>     | ENSP00000332353 | 160 | 26 | 6.15 |
| <b>DDIT3</b>     | ENSP00000340671 | 6   | 1  | 6    |
| <b>NOVA1</b>     | ENSP00000438875 | 6   | 1  | 6    |
| <b>CNR1</b>      | ENSP00000358511 | 6   | 1  | 6    |
| <b>SMARCA4</b>   | ENSP00000395654 | 41  | 7  | 5.86 |
| <b>PIK3R1</b>    | ENSP00000428056 | 34  | 6  | 5.67 |
| <b>PIK3R1</b>    | ENSP00000429277 | 34  | 6  | 5.67 |
| <b>PIK3R1</b>    | ENSP00000274335 | 34  | 6  | 5.67 |
| <b>TNFAIP3</b>   | ENSP00000237289 | 51  | 9  | 5.67 |
| <b>CDH1</b>      | ENSP00000261769 | 97  | 18 | 5.39 |
| <b>SF3B1</b>     | ENSP00000335321 | 32  | 6  | 5.33 |
| <b>TUBA4A</b>    | ENSP00000375938 | 5   | 1  | 5    |
| <b>KCNA4</b>     | ENSP00000328511 | 10  | 2  | 5    |
| <b>MPPED2</b>    | ENSP00000350833 | 5   | 1  | 5    |
| <b>PAK3</b>      | ENSP00000401982 | 5   | 1  | 5    |
| <b>TMEFF2</b>    | ENSP00000272771 | 5   | 1  | 5    |
| <b>PAK3</b>      | ENSP00000410853 | 5   | 1  | 5    |
| <b>MAP2K4</b>    | ENSP00000410402 | 5   | 1  | 5    |
| <b>PPP2R1A</b>   | ENSP00000324804 | 15  | 3  | 5    |
| <b>PPBP</b>      | ENSP00000296028 | 5   | 1  | 5    |
| <b>KHDRBS3</b>   | ENSP00000348108 | 5   | 1  | 5    |
| <b>P2RY10</b>    | ENSP00000443138 | 5   | 1  | 5    |
| <b>HOXC9</b>     | ENSP00000302836 | 5   | 1  | 5    |
| <b>BAP1</b>      | ENSP00000417132 | 35  | 7  | 5    |
| <b>FBXO28</b>    | ENSP00000355827 | 5   | 1  | 5    |
| <b>TUBA4A</b>    | ENSP00000248437 | 5   | 1  | 5    |
| <b>DDIT3</b>     | ENSP00000447188 | 5   | 1  | 5    |
| <b>HIST1H4H</b>  | ENSP00000366956 | 5   | 1  | 5    |
| <b>P2RY10</b>    | ENSP00000171757 | 5   | 1  | 5    |
| <b>PBRM1</b>     | ENSP00000338302 | 70  | 15 | 4.67 |
| <b>CYLD</b>      | ENSP00000308928 | 13  | 3  | 4.33 |
| <b>RUNX1T1</b>   | ENSP00000353504 | 13  | 3  | 4.33 |
| <b>ABL1</b>      | ENSP00000323315 | 75  | 18 | 4.17 |
| <b>CBLN4</b>     | ENSP00000064571 | 4   | 1  | 4    |
| <b>HIST2H2BE</b> | ENSP00000358151 | 4   | 1  | 4    |
| <b>CYLD</b>      | ENSP00000392025 | 12  | 3  | 4    |
| <b>EBF3</b>      | ENSP00000357637 | 4   | 1  | 4    |
| <b>EIF2C3</b>    | ENSP00000362287 | 4   | 1  | 4    |
| <b>PHOX2B</b>    | ENSP00000226382 | 4   | 1  | 4    |
| <b>STK38L</b>    | ENSP00000373684 | 4   | 1  | 4    |

|                |                 |     |    |      |
|----------------|-----------------|-----|----|------|
| <b>MAPK8</b>   | ENSP00000363297 | 4   | 1  | 4    |
| <b>KCNJ6</b>   | ENSP00000383330 | 4   | 1  | 4    |
| <b>E2F5</b>    | ENSP00000398124 | 4   | 1  | 4    |
| <b>KCNV1</b>   | ENSP00000435954 | 4   | 1  | 4    |
| <b>MAPK8</b>   | ENSP00000363304 | 4   | 1  | 4    |
| <b>KCNV1</b>   | ENSP00000297404 | 4   | 1  | 4    |
| <b>KIF3A</b>   | ENSP00000368020 | 4   | 1  | 4    |
| <b>PAK3</b>    | ENSP00000262836 | 4   | 1  | 4    |
| <b>MOSPD1</b>  | ENSP00000359819 | 4   | 1  | 4    |
| <b>SCAI</b>    | ENSP00000362650 | 4   | 1  | 4    |
| <b>PIK3CA</b>  | ENSP00000417479 | 4   | 1  | 4    |
| <b>DNAJC25</b> | ENSP00000320650 | 4   | 1  | 4    |
| <b>USF1</b>    | ENSP00000356999 | 4   | 1  | 4    |
| <b>KEAP1</b>   | ENSP00000377245 | 19  | 5  | 3.8  |
| <b>BCL10</b>   | ENSP00000359612 | 15  | 4  | 3.75 |
| <b>RUNX1T1</b> | ENSP00000265814 | 15  | 4  | 3.75 |
| <b>BCL10</b>   | ENSP00000271015 | 15  | 4  | 3.75 |
| <b>FTSJD2</b>  | ENSP00000362550 | 7   | 2  | 3.5  |
| <b>GNA11</b>   | ENSP00000078429 | 7   | 2  | 3.5  |
| <b>RORB</b>    | ENSP00000366093 | 7   | 2  | 3.5  |
| <b>MMP16</b>   | ENSP00000286614 | 14  | 4  | 3.5  |
| <b>KCNJ3</b>   | ENSP00000295101 | 7   | 2  | 3.5  |
| <b>FGFR2</b>   | ENSP00000351276 | 53  | 16 | 3.31 |
| <b>CDKN2A</b>  | ENSP00000307101 | 36  | 11 | 3.27 |
| <b>PAX5</b>    | ENSP00000350844 | 16  | 5  | 3.2  |
| <b>MSH2</b>    | ENSP00000233146 | 107 | 34 | 3.15 |
| <b>CBL</b>     | ENSP00000264033 | 44  | 14 | 3.14 |
| <b>MLH1</b>    | ENSP00000231790 | 121 | 40 | 3.03 |
| <b>PIAS1</b>   | ENSP00000249636 | 3   | 1  | 3    |
| <b>EIF3D</b>   | ENSP00000216190 | 3   | 1  | 3    |
| <b>CPSF3</b>   | ENSP00000238112 | 6   | 2  | 3    |
| <b>KCNJ9</b>   | ENSP00000357067 | 3   | 1  | 3    |
| <b>THAP10</b>  | ENSP00000249861 | 3   | 1  | 3    |
| <b>GPR26</b>   | ENSP00000284674 | 3   | 1  | 3    |
| <b>MAPK14</b>  | ENSP00000229794 | 3   | 1  | 3    |
| <b>MAPK14</b>  | ENSP00000229795 | 3   | 1  | 3    |
| <b>DCUN1D3</b> | ENSP00000319482 | 3   | 1  | 3    |
| <b>CLDN11</b>  | ENSP00000064724 | 3   | 1  | 3    |
| <b>DIRAS3</b>  | ENSP00000378627 | 3   | 1  | 3    |
| <b>CYTH2</b>   | ENSP00000391648 | 3   | 1  | 3    |
| <b>MAPK8</b>   | ENSP00000363294 | 3   | 1  | 3    |

|                  |                 |   |   |   |
|------------------|-----------------|---|---|---|
| <b>LYPLA2</b>    | ENSP00000363638 | 3 | 1 | 3 |
| <b>COPS7B</b>    | ENSP00000272995 | 3 | 1 | 3 |
| <b>CDK8</b>      | ENSP00000370938 | 3 | 1 | 3 |
| <b>CYCS</b>      | ENSP00000387279 | 3 | 1 | 3 |
| <b>DIRAS3</b>    | ENSP00000360020 | 3 | 1 | 3 |
| <b>GPR85</b>     | ENSP00000297146 | 3 | 1 | 3 |
| <b>HIST1H3H</b>  | ENSP00000358160 | 3 | 1 | 3 |
| <b>INSIG2</b>    | ENSP00000245787 | 3 | 1 | 3 |
| <b>U2SURP</b>    | ENSP00000381027 | 3 | 1 | 3 |
| <b>SETDB1</b>    | ENSP00000409379 | 3 | 1 | 3 |
| <b>GTF2B</b>     | ENSP00000359531 | 3 | 1 | 3 |
| <b>VBP1</b>      | ENSP00000286428 | 3 | 1 | 3 |
| <b>IL1B</b>      | ENSP00000263341 | 3 | 1 | 3 |
| <b>FAM127B</b>   | ENSP00000375267 | 3 | 1 | 3 |
| <b>TNPO2</b>     | ENSP00000389648 | 3 | 1 | 3 |
| <b>ARMCX3</b>    | ENSP00000454483 | 3 | 1 | 3 |
| <b>DCLK1</b>     | ENSP00000255448 | 6 | 2 | 3 |
| <b>PHF23</b>     | ENSP00000322579 | 3 | 1 | 3 |
| <b>RBBP7</b>     | ENSP00000369427 | 3 | 1 | 3 |
| <b>RGS7BP</b>    | ENSP00000334851 | 3 | 1 | 3 |
| <b>CBFB</b>      | ENSP00000290858 | 3 | 1 | 3 |
| <b>CYCS</b>      | ENSP00000307786 | 3 | 1 | 3 |
| <b>TNPO2</b>     | ENSP00000349321 | 3 | 1 | 3 |
| <b>SNRPA</b>     | ENSP00000243563 | 3 | 1 | 3 |
| <b>COPS7B</b>    | ENSP00000386567 | 3 | 1 | 3 |
| <b>RHOB</b>      | ENSP00000272233 | 3 | 1 | 3 |
| <b>RALA</b>      | ENSP00000005257 | 3 | 1 | 3 |
| <b>ZIC1</b>      | ENSP00000282928 | 6 | 2 | 3 |
| <b>TADA3</b>     | ENSP00000307684 | 3 | 1 | 3 |
| <b>RAB31</b>     | ENSP00000304565 | 3 | 1 | 3 |
| <b>HIST1H2AJ</b> | ENSP00000328484 | 3 | 1 | 3 |
| <b>GULP1</b>     | ENSP00000352047 | 3 | 1 | 3 |
| <b>FBXO21</b>    | ENSP00000328187 | 3 | 1 | 3 |
| <b>FOXG1</b>     | ENSP00000371975 | 3 | 1 | 3 |
| <b>MAPK8</b>     | ENSP00000353483 | 3 | 1 | 3 |
| <b>CYCS</b>      | ENSP00000386270 | 3 | 1 | 3 |
| <b>AKT3</b>      | ENSP00000355497 | 3 | 1 | 3 |
| <b>NFIX</b>      | ENSP00000353219 | 3 | 1 | 3 |
| <b>PAK3</b>      | ENSP00000361080 | 3 | 1 | 3 |
| <b>ARMCX3</b>    | ENSP00000340672 | 3 | 1 | 3 |
| <b>NRXN3</b>     | ENSP00000394426 | 6 | 2 | 3 |

|                |                 |    |    |   |
|----------------|-----------------|----|----|---|
| <b>TADA3</b>   | ENSP00000393471 | 3  | 1  | 3 |
| <b>EBF2</b>    | ENSP00000430241 | 6  | 2  | 3 |
| <b>ARMCX3</b>  | ENSP00000439032 | 3  | 1  | 3 |
| <b>KCNA6</b>   | ENSP00000408321 | 3  | 1  | 3 |
| <b>BAI3</b>    | ENSP00000359630 | 51 | 17 | 3 |
| <b>ST3GAL3</b> | ENSP00000355341 | 3  | 1  | 3 |
| <b>FBXW7</b>   | ENSP00000263981 | 18 | 6  | 3 |
| <b>RBBP5</b>   | ENSP00000264515 | 3  | 1  | 3 |
| <b>RBM39</b>   | ENSP00000253363 | 3  | 1  | 3 |
